# Supplementary material for: Optimization of an Ultrasound-Assisted Extraction for Simultaneous Determination of Antioxidants in Sesame with Response Surface Methodology
Source: PubMed Central journal article supplement (PMC6720519; doi:10.3390/antiox8080321), 2019-08-19
Supplement: antioxidants-08-00321-s001.pdf [file antioxidants-08-00321-s001.pdf]

1 **Optimization of an Ultrasound-assisted extraction for simultaneous**  
2 **determination of antioxidants in sesame with response surface**  
3 **methodology**

4 Dandan Wang<sup>1,2,†</sup>, Liangxiao Zhang<sup>1,3,4,†</sup>, Yueqing Xu<sup>1,2</sup>, Xin Qi<sup>1,4</sup>, Xuefang Wang<sup>1,4</sup>, Xiupin  
5 Wang<sup>1,4</sup>, Qi Zhang<sup>1,5</sup>, Peiwu Li<sup>1,3,4,5,\*</sup>

6 <sup>1</sup> Oil Crops Research Institute, Chinese Academy of Agricultural Sciences, Wuhan 430062,  
7 China

8 <sup>2</sup> Key Laboratory of Biology and Genetic Improvement of Oil Crops, Ministry of Agriculture  
9 and Rural Affairs, Wuhan 430062, China

10 <sup>3</sup> Laboratory of Quality and Safety Risk Assessment for Oilseed Products (Wuhan), Ministry  
11 of Agriculture and Rural Affairs, Wuhan 430062, China

12 <sup>4</sup> Quality Inspection and Test Center for Oilseed Products, Ministry of Agriculture and Rural  
13 Affairs, Wuhan 430062, China

14 <sup>5</sup> Key Laboratory of Detection for Mycotoxins, Ministry of Agriculture and Rural Affairs,  
15 Wuhan 430062, China

16 <sup>†</sup> These authors contributed equally to this study

17

18 \*Corresponding authors: prof. Peiwu Li at Oil Crops Research Institute, Chinese Academy of  
19 Agricultural Sciences, Wuhan 430062, China

20 Tel.: +86 27 86812943; Fax: +86 27 86812862

21 E-mail addresses: [Peiwuli@oilcrops.cn](mailto:Peiwuli@oilcrops.cn) (P. Li)

22

23 **Supplementary Materials**

24 Figure S1 Results of preliminary screening on six general parameters

25 Figure S2 LC-MS/MS chromatograms obtained for the standard solution of 10 targets

26 Figure S3 Box plot of differential compounds

27 Table S1 Factors and coded value of Plackett-Burman design

28 Table S2 Design matrix and results of Plackett-Burman test

29 Table S3 Factors and coded value of Box-Behnken design

30 Table S4 Design matrix and results of Box-Behnken test

31 Table S5 Analysis results of Plackett-Burman design

32 Table S6 Analysis results of Box-Behnken design

33

34

35 Figure S1 Results of preliminary screening on six general parameters

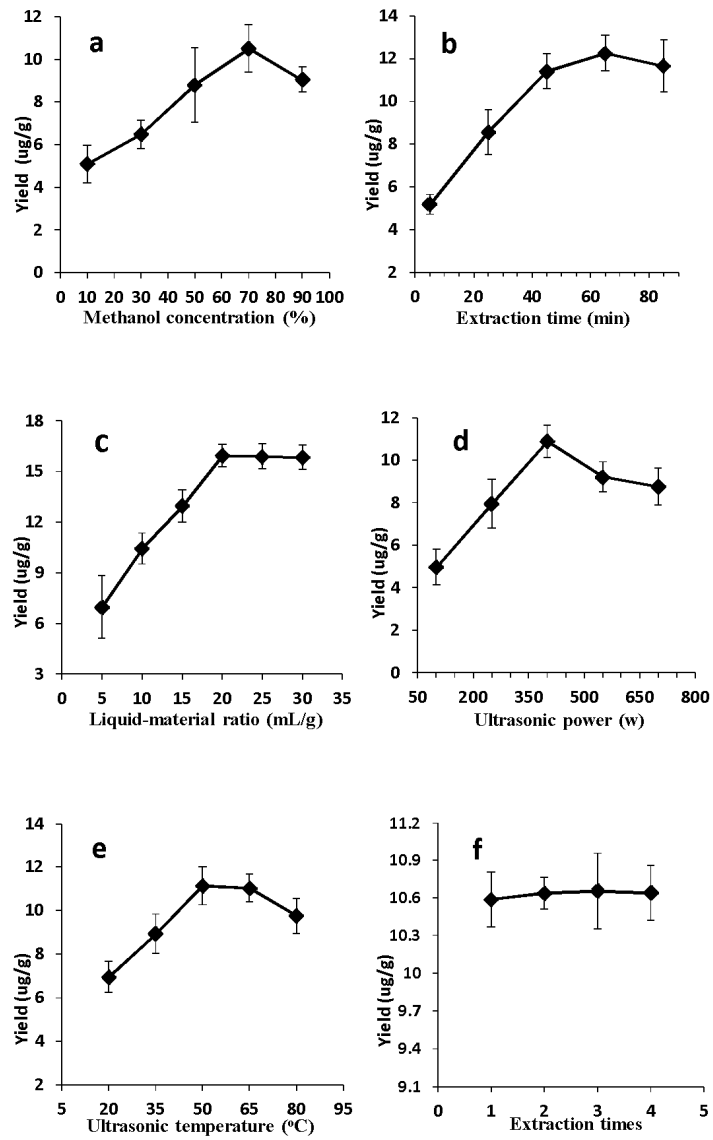

36

37

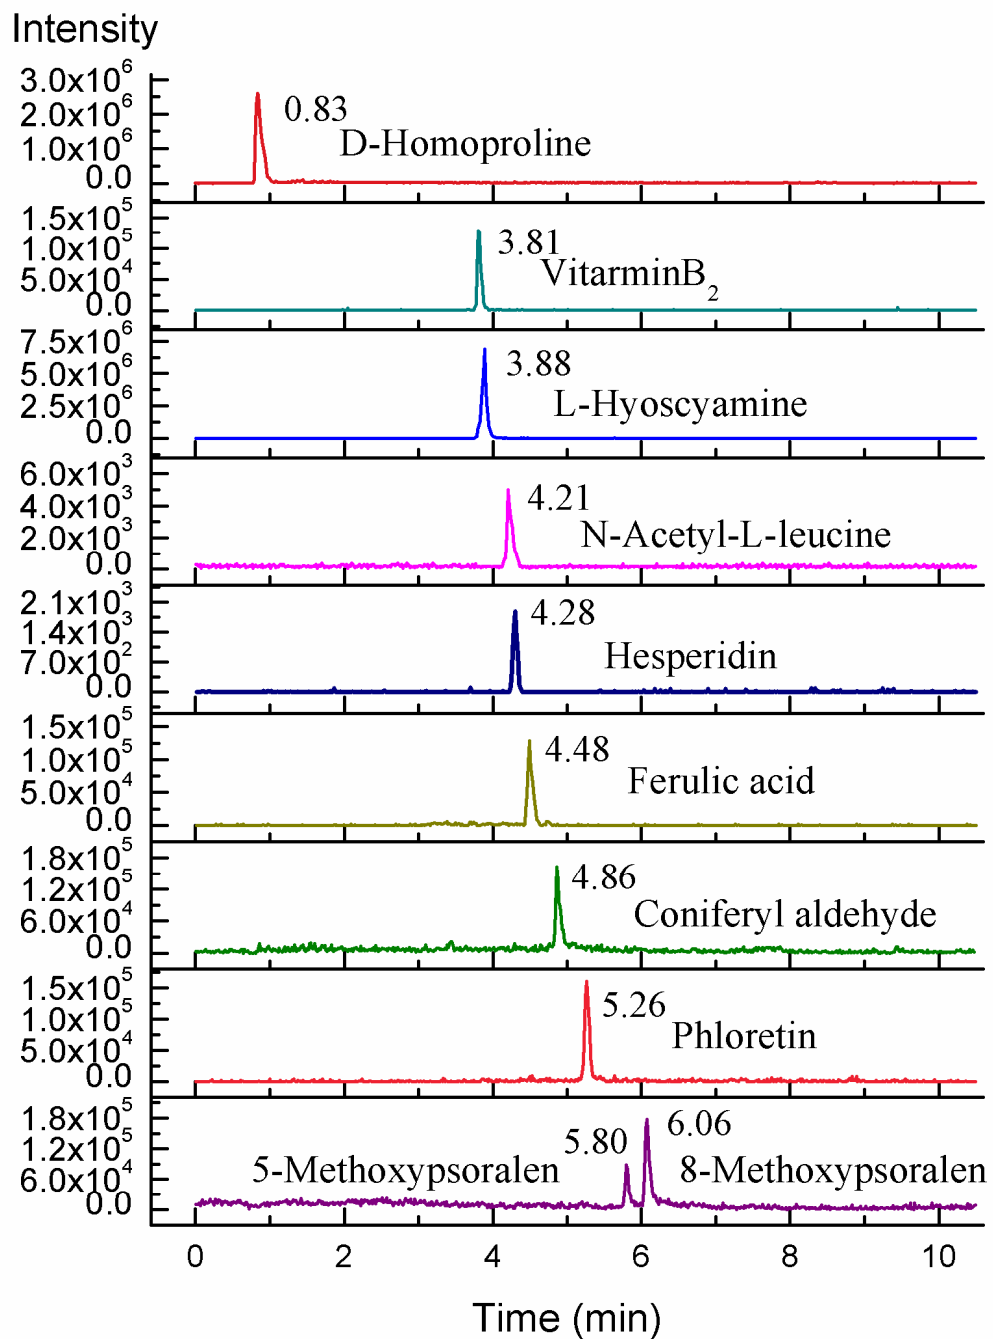

Figure S3 Box plot of differential compounds

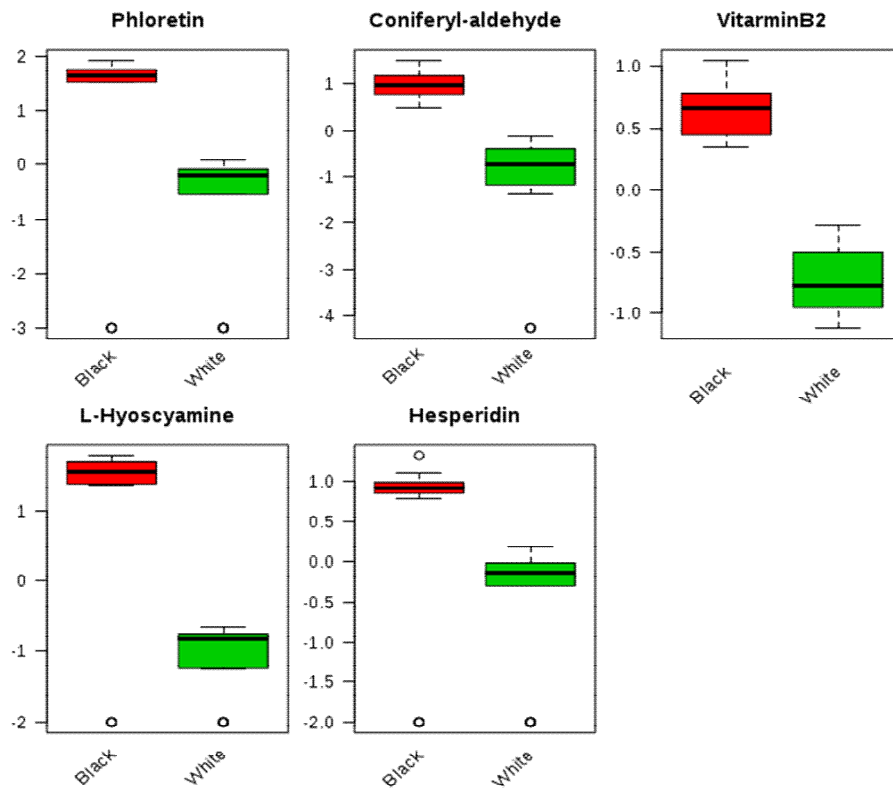

44 **Table S1 Factors and coded value of Plackett-Burman design**

| Term           | Variable                     | Coded level |      |
|----------------|------------------------------|-------------|------|
|                |                              | -1          | 1    |
| X <sub>1</sub> | liquid-solid ratio (mL/g)    | 15/1        | 25/1 |
| X <sub>2</sub> | ultrasonic power (w)         | 300         | 500  |
| X <sub>3</sub> | ultrasonic time (min)        | 35          | 55   |
| X <sub>4</sub> | ultrasonic temperature (°C)  | 40          | 60   |
| X <sub>5</sub> | methanol volume fraction (%) | 70          | 90   |
| X <sub>6</sub> | extraction times             | 1           | 3    |

45

46

**Table S2 Design matrix and results of Plackett-Burman test**

| Run | Liquid-solid ratio<br>(X <sub>1</sub> ) | Ultrasonic power<br>(X <sub>2</sub> ) | Ultrasonic time<br>(X <sub>3</sub> ) | Ultrasonic temperature<br>(X <sub>4</sub> ) | Methanol volume<br>fraction (X <sub>5</sub> ) | Extraction times<br>(X <sub>6</sub> ) | Total actual yield<br>(ug/g) |
|-----|-----------------------------------------|---------------------------------------|--------------------------------------|---------------------------------------------|-----------------------------------------------|---------------------------------------|------------------------------|
| 1   | -1                                      | -1                                    | -1                                   | -1                                          | 1                                             | 1                                     | 9.265                        |
| 2   | 1                                       | 1                                     | -1                                   | 1                                           | 1                                             | 1                                     | 9.530                        |
| 3   | 1                                       | -1                                    | -1                                   | 1                                           | -1                                            | -1                                    | 17.518                       |
| 4   | -1                                      | -1                                    | 1                                    | 1                                           | 1                                             | 1                                     | 10.183                       |
| 5   | 1                                       | 1                                     | 1                                    | -1                                          | 1                                             | -1                                    | 9.346                        |
| 6   | -1                                      | 1                                     | -1                                   | 1                                           | 1                                             | -1                                    | 9.095                        |
| 7   | -1                                      | 1                                     | -1                                   | -1                                          | -1                                            | -1                                    | 11.596                       |
| 8   | -1                                      | 1                                     | 1                                    | -1                                          | -1                                            | 1                                     | 11.959                       |
| 9   | 1                                       | -1                                    | -1                                   | -1                                          | -1                                            | 1                                     | 17.888                       |
| 10  | 1                                       | 1                                     | 1                                    | 1                                           | -1                                            | 1                                     | 16.433                       |
| 11  | 1                                       | -1                                    | 1                                    | -1                                          | 1                                             | -1                                    | 11.165                       |
| 12  | -1                                      | -1                                    | 1                                    | 1                                           | -1                                            | -1                                    | 13.915                       |

47

48

49

50

**Table S3 Factors and coded value of Box-Behnken design**

| Term           | Variable                     | Coded level |      |      |
|----------------|------------------------------|-------------|------|------|
|                |                              | -1          | 0    | 1    |
| X <sub>1</sub> | liquid-solid ratio (mL/g)    | 15/1        | 20/1 | 25/1 |
| X <sub>2</sub> | ultrasonic power (w)         | 300         | 400  | 500  |
| X <sub>5</sub> | methanol volume fraction (%) | 70          | 90   | 90   |

51

52



53

54

**Table S4 Design matrix and results of Box-Behnken test**

| Run | Liquid-solid ratio<br>(X <sub>1</sub> ) | Ultrasonic power<br>(X <sub>2</sub> ) | Methanol volume<br>fraction (X <sub>5</sub> ) | Total actual yield<br>(ug/g) |
|-----|-----------------------------------------|---------------------------------------|-----------------------------------------------|------------------------------|
| 1   | -1                                      | -1                                    | 0                                             | 12.322                       |
| 2   | 1                                       | -1                                    | 0                                             | 15.381                       |
| 3   | -1                                      | 1                                     | 0                                             | 12.896                       |
| 4   | 1                                       | 1                                     | 0                                             | 17.828                       |
| 5   | -1                                      | 0                                     | -1                                            | 17.303                       |
| 6   | 1                                       | 0                                     | -1                                            | 19.937                       |
| 7   | -1                                      | 0                                     | 1                                             | 15.013                       |
| 8   | 1                                       | 0                                     | 1                                             | 17.326                       |
| 9   | 0                                       | -1                                    | -1                                            | 16.694                       |
| 10  | 0                                       | 1                                     | -1                                            | 17.912                       |
| 11  | 0                                       | -1                                    | 1                                             | 14.298                       |
| 12  | 0                                       | 1                                     | 1                                             | 15.977                       |
| 13  | 0                                       | 0                                     | 0                                             | 21.135                       |
| 14  | 0                                       | 0                                     | 0                                             | 21.537                       |
| 15  | 0                                       | 0                                     | 0                                             | 21.308                       |

**Table S5 Analysis results of Plackett-Burman design**

| <b>Regression data</b>      |                          |                           |                       |                |                    |
|-----------------------------|--------------------------|---------------------------|-----------------------|----------------|--------------------|
| <b>Variable</b>             | <b>Degree of freedom</b> | <b>Parameter Estimate</b> | <b>Standard Error</b> | <b>t Value</b> | <b>Pr &gt;  t </b> |
| Intercept                   | 1                        | 12.32442                  | 0.30139               | 40.89          | 0.0005**           |
| X <sub>1</sub>              | 1                        | 1.32225                   | 0.30139               | 4.39           | 0.0071**           |
| X <sub>2</sub>              | 1                        | -0.99792                  | 0.30139               | -3.31          | 0.0212*            |
| X <sub>3</sub>              | 1                        | -0.15758                  | 0.30139               | -0.52          | 0.6234             |
| X <sub>4</sub>              | 1                        | 0.45458                   | 0.30139               | 1.51           | 0.1918             |
| X <sub>5</sub>              | 1                        | -2.56042                  | 0.30139               | -8.50          | 0.0004**           |
| X <sub>6</sub>              | 1                        | 0.21858                   | 0.30139               | 0.73           | 0.5008             |
| <b>Analysis of Variance</b> |                          |                           |                       |                |                    |
| <b>Source</b>               | <b>Degree of freedom</b> | <b>Sum of squares</b>     | <b>Mean square</b>    | <b>F Value</b> | <b>Pr &gt; F</b>   |
| Model                       | 6                        | 114.95008                 | 19.15835              | 17.58          | 0.0032**           |
| Error                       | 5                        | 5.45002                   | 1.09000               |                |                    |
| Corrected Total             | 11                       | 120.40010                 |                       |                |                    |
| Root MSE                    | 1.04403                  | R-Square                  | 0.9547                |                |                    |
| Dependent Mean              | 12.32442                 | Adj R-Sq                  | 0.9004                |                |                    |
| Coeff Var                   | 8.47126                  |                           |                       |                |                    |

\*,\*\* represent significant differences (P<0.05) and extremely significant differences (P<0.01),

respectively.

**Table S6 Analysis results of Plackett-Burman design**

| Source                         | Degree of freedom | Sum of squares     | Mean Square    | F Value                         | Pr > F   |
|--------------------------------|-------------------|--------------------|----------------|---------------------------------|----------|
| Linear                         | 3                 | 35.95549           | 0.2994         | 46.74                           | 0.0004** |
| Quadratic                      | 3                 | 81.893687          | 0.6820         | 106.46                          | <.0001** |
| Crossproduct                   | 3                 | 0.955923           | 0.0080         | 1.24                            | 0.3870   |
| Total Model                    | 9                 | 118.805159         | 0.9893         | 51.48                           | 0.0002** |
| Lack of Fit                    | 3                 | 1.200776           | 0.400259       | 9.84                            | 0.0936   |
| Pure Error                     | 2                 | 0.081325           | 0.040662       |                                 |          |
| Total Error                    | 5                 | 1.282101           | 0.256420       |                                 |          |
| <b>Root MSE</b>                | 0.506380          | <b>R-Square</b>    | 0.9893         | <b>Coefficient of Variation</b> | 2.9571   |
| Variable                       | Degree of freedom | Parameter Estimate | Standard Error | t Value                         | Pr >  t  |
| Intercept                      | 1                 | -151.965333        | 22.074508      | -6.88                           | 0.0010** |
| X <sub>1</sub>                 | 1                 | 4.513583           | 0.619841       | 7.23                            | 0.0008** |
| X <sub>2</sub>                 | 1                 | 0.295224           | 0.030992       | 9.53                            | 0.0002** |
| X <sub>5</sub>                 | 1                 | 172.533333         | 44.566674      | 3.87                            | 0.0117*  |
| X <sub>1</sub> *X <sub>1</sub> | 1                 | -0.110908          | 0.010541       | -10.52                          | <.0001** |
| X <sub>2</sub> *X <sub>1</sub> | 1                 | 0.000936           | 0.000506       | 1.85                            | 0.1236   |
| X <sub>2</sub> *X <sub>2</sub> | 1                 | -0.000395          | 0.000026353    | -14.98                          | <.0001** |
| X <sub>5</sub> *X <sub>1</sub> | 1                 | -0.160500          | 0.506380       | -0.32                           | 0.7641   |
| X <sub>5</sub> *X <sub>2</sub> | 1                 | 0.011525           | 0.025319       | 0.46                            | 0.6681   |
| X <sub>5</sub> *X <sub>5</sub> | 1                 | -115.920833        | 26.352827      | -4.40                           | 0.0070** |

\*,\*\* represent significant differences (P<0.05), extremely significant differences (P<0.01),

respectively; F listed value (95%), F<sub>9,5</sub> = 3.63.
